# Supplementary material for: KGF-2 and FGF-21 poloxamer 407 hydrogel coordinates inflammation and proliferation homeostasis to enhance wound repair of scalded skin in diabetic rats
Source: PubMed Central journal article supplement — BMJ Open Diabetes Res Care. 2020 May 19;8(1):e001009. doi: 10.1136/bmjdrc-2019-001009 (PMC7245451; doi:10.1136/bmjdrc-2019-001009), 2020-05-19
Supplement: bmjdrc-2019-001009supp001.pdf [file bmjdrc-2019-001009supp001.pdf]

Supplementary Fig. 1.

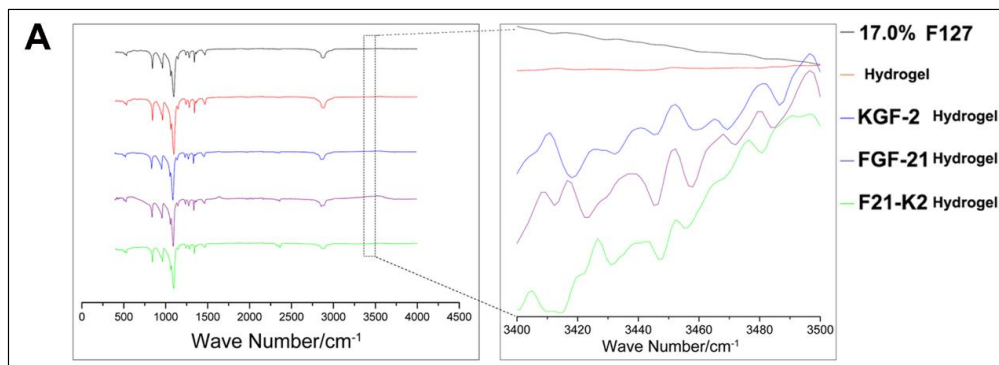

**Supplementary Fig. 1.** (A) Infrared scanning spectra of thermosensitive hydrogel. The highest intensities in the poloxamer 407 hydrogel group were observed at  $1100\text{ cm}^{-1}$  and  $2850\text{-}2880\text{ cm}^{-1}$ , corresponding to the C-O-C and C-H stretch of  $\text{CH}_2\text{CH}_3$ . The highest intensities of the KGF-2 and FGF-21 loaded hydrogels were observed at  $3400\text{ to }3500\text{ cm}^{-1}$ , corresponding to the N-H stretch of acid amide,

Supplementary Figure 2.

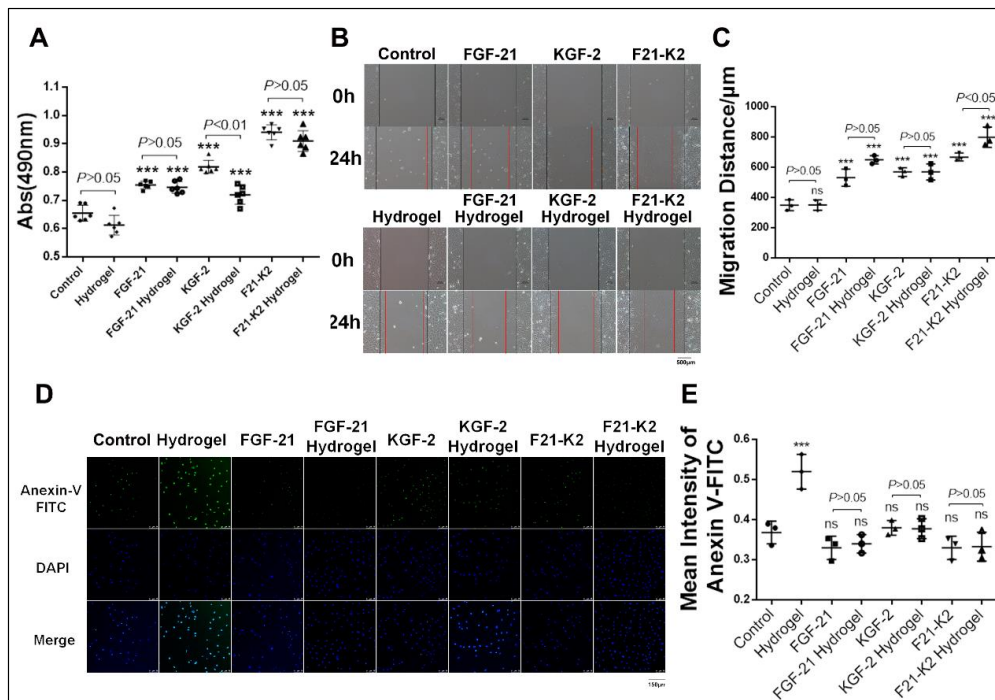

**Supplementary Figure 2. Activity and toxicology of FGF-21 and KGF-2 loaded thermosensitive hydrogel in vitro.** (A) MTT experimental activity results statistics. (B) Scratch photographs (magnification is 100 folds, scale bar: 500  $\mu\text{m}$ ). (C) Cell migration distance statistics (n=3). (D) Annexin-V apoptosis fluorescence photographs, 24h (magnification is 100 folds, scale bar: 500 $\mu\text{m}$ ). (E) Annexin-V average fluorescence intensity statistics (n=3). Compared with control group, \*\*\*  $P < 0.001$ ; ns,  $P > 0.05$ .

**Supplementary Figure 3.**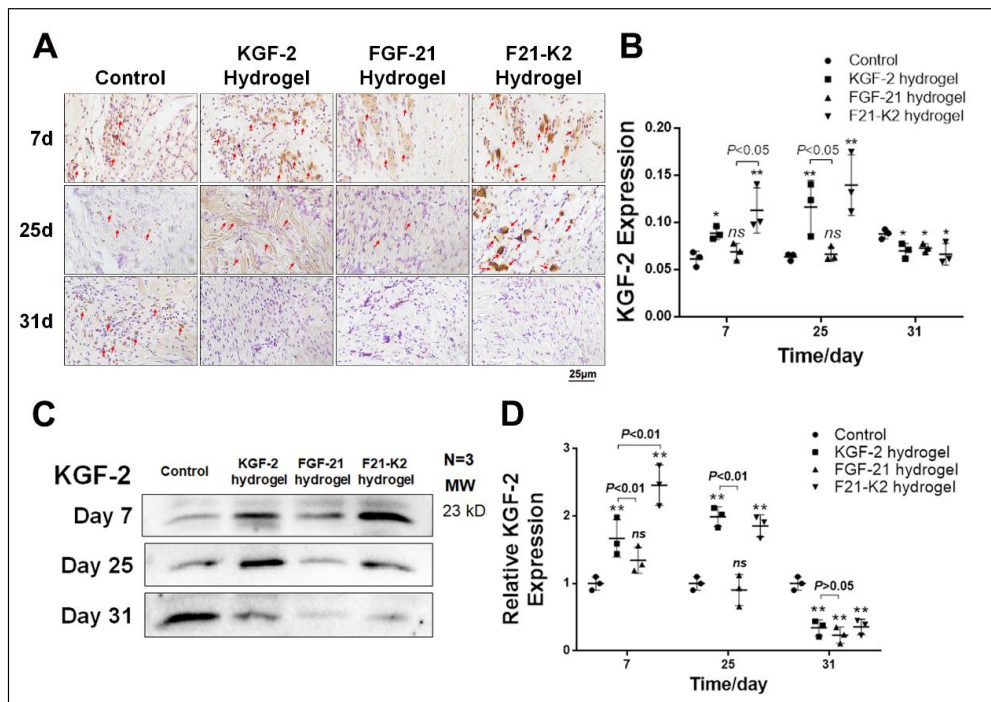

**Supplementary Fig.3 Expression of KGF-2 protein measured with immunohistochemistry and Western Blot.** (A) Immunostaining of KGF-2 in dermis on days 7, 25 and 31 (red arrow indicates expression of KGF-2, bar: 25  $\mu$ m). (B) Statistical analysis of KGF-2 expression measured with immunohistochemistry in dermis (n=3). (C) Western Blot of KGF-2 in skin section of rats on days 7, 25 and 31. (D) Statistical analysis of KGF-2 expression measured with Western Blot (n=3). Compared with control group, \* P<0.01, \*\* P<0.01, ns, P>0.05.
